## Learning the payoffs and costs of actions

Moritz Möller<sup>1</sup>, Rafal Bogacz<sup>1\*</sup>

**1** MRC Brain Network Dynamics Unit, Nuffield Department of Clinical Neurosciences, University of Oxford, Oxford, UK

\* rafal.bogacz@ndcn.ox.ac.uk

### Abstract

A set of sub-cortical nuclei called basal ganglia is critical for learning the values of actions. The basal ganglia include two pathways, which have been associated with approach and avoid behavior respectively, and are differentially modulated by dopamine projections from the midbrain. According to the influential opponent actor learning model, these pathways represent learned estimates of the positive and negative consequences (payoffs and costs) of actions. The level of dopamine release controls to what extent payoffs and costs enter the overall evaluation of actions. How the knowledge about payoff and cost is acquired is still an open question, even though many theories describe learning from feedback in the basal ganglia. We examine whether a set of plasticity rules proposed to model reinforcement learning in the pathways of the basal ganglia is suitable to extract payoffs and costs from a reward prediction error signal. First, we determine the result of such learning, both analytically and via simulations, for different reward schedules that feature payoffs and costs. Then, we combine the plasticity rules with a decision rule to examine the emerging effect of dopaminergic modulation on the willingness to work for reward. We find that the plasticity rules are suitable to infer the mean payoffs and costs of actions, if those occur at different moments in time. Successful learning requires differential effects of positive and negative reward prediction errors on the two pathways, and a weak decay of synaptic

weights over trials. We also confirm that dopaminergic modulation produces effects on the willingness to work for reward similar to those observed in classical experiments.

## Author summary

The basal ganglia are structures underneath the surface of the vertebrate brain, associated with error driven learning. Much is known about the anatomical and biological features of the basal ganglia; scientists now try to understand the algorithms implemented by these structures. Numerous models aspire to capture the learning functionality, but many of them only cover some specific aspect of the algorithm. Instead of further adding to that pool of partial models, we unify two existing ones - one which captures what the basal ganglia learns, and one that describes the learning mechanism itself. The first model suggests that the basal ganglia keeps track of both positive and negative consequences of frequent opportunities, and weighs these by the motivational state in decisions. It explains how payoff and cost are represented, but not how those representations arise. The other model consists of biologically plausible plasticity rules, which describe how learning takes place, but not how the brain makes use of what is learned. We show that the two theories are compatible. Together, they form a model of learning and decision making that integrates the motivational state as well as the learned payoffs and costs of opportunities.

## Introduction

What guides rational behavior in a complex environment? Certainly, knowledge of the typical payoffs and costs of available actions is critical for successful action selection. If those payoffs and costs are represented separately in the animal's brain, they can be weighted depending of animal's motivational state. For example, consider the action 'harvesting a fruit from a tree'. It has a payoff connected with the nutrients in the fruit, but also costs related to the effort and risks associated with climbing a tree. The nutrients in the fruit are only valuable for the animal if its hungry. So, when it is hungry, the payoffs should be weighted more than the costs, to ensure that the animal searches for food. By contrast when the animal is not hungry at all, the costs should be

weighted more, to make sure that it does not climb the tree without necessity. 11

In all vertebrates, an important role in this process of action evaluation and selection 12  
is played by a set of subcortical structures called the basal ganglia [1]. The basal 13  
ganglia is organized into two main pathways shown schematically in green and red in 14  
Fig 1. The Go or direct pathway is related to the initiation of movements, while the 15  
No-Go or indirect pathway is related to the inhibition of movements [2]. These two 16  
pathways include two separate populations of striatal neurons expressing different 17  
dopaminergic receptors [3]. The striatal Go neurons express D1 receptors and are 18  
excited by dopamine, while the striatal No-Go neurons express D2 receptors and are 19  
inhibited by dopamine [4]. Thus dopamine changes the balance between the two 20  
pathways and promotes action initiation over inhibition. 21

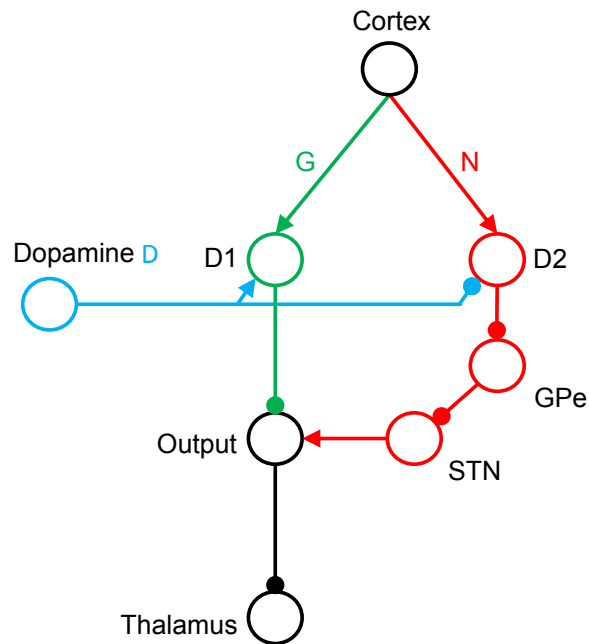

**Fig 1. The organization of the basal ganglia.** Circles denote neural populations in the areas indicated by labels next to them, where D1 and D2 corresponds to striatal neurons expressing D1 and D2 receptors respectively, STN stands for the subthalamic nucleus, GPe for the external segment of globus pallidus, and Output for the output nuclei of the basal ganglia, i.e. internal segment of globus pallidus and substantia nigra pars reticulata. Arrows and lines ending with circles denote excitatory and inhibitory connections respectively.

The competition between Go and No-Go pathways during action selection and the 22  
role of dopaminergic modulation are subject of many interpretations and models, 23  
e.g. [5–7]. In particular, the Opponent Actor Learning (OpAL) hypothesis suggests that 24

the Go and No-Go neurons encode the positive and negative consequences of actions  
respectively [8]. As the dopaminergic neurons modulate the Go and No-Go neurons in  
opposite ways, dopamine controls the extent to which positive and negative  
consequences affect the activity in the thalamus, through the output of the basal  
ganglia [8]. For example, when motivation is high, the dopaminergic neurons will excite  
the Go neurons and inhibit the No-Go neurons. Consequently, the payoffs will be  
weighted stronger than the costs. By contrast, when the motivation is low, the Go  
neurons will not be excited, but the No-Go neurons will be released from inhibition,  
such that the costs are weighted stronger.

Much research has also focused on how the synapses of Go and No-Go neurons are  
modified by experience. Systematic investigation revealed that bursts of activity of  
dopaminergic neurons encode reward prediction errors, which measure the difference  
between reward obtained and expected [9,10]. Such dopaminergic activity produces  
distinct changes in the synaptic weights of Go and No-Go neurons [11]. Several  
computational models have attempted to describe the learning process of the synapses  
of Go and No-Go neurons [12–15]. Among these models, the OpAL model provided  
simple and analytically tractable rules describing the changes in weights of Go and  
No-Go neurons as a function of reward prediction errors [8].

However, no-one so far examined how the basal ganglia might estimate payoff and  
cost if they are both associated with the same action. The novel contribution of this  
work is to demonstrate that a set of recently proposed learning rules [16] allows the Go  
and No-Go neurons to estimate both payoffs and costs associated with single actions.  
We thus merge the interpretation of the striatal pathways of Collins and Frank with the  
striatal learning rules of Mikhael and Bogacz, to ultimately obtain a consistent theory  
of learning the payoffs and costs of actions.

According to the experimental and modelling work mentioned above, dopaminergic  
activity encodes both information about motivational state and the reward prediction  
error. However, if the dopaminergic neurons carried both signals, the striatal neurons  
would need a way to decode each signal and react appropriately, i.e. change their  
activity according to the motivation signal, and change the synaptic weights according  
to the prediction error. The prominent suggestion that motivation might be encoded in  
the average or tonic dopamine level, and reward prediction errors in the burst or phasic

activity [17] has recently been questioned; it seems to be contradicted by the  
observation of fast-changing dopaminergic activity that encodes motivation [18–20].  
Nevertheless, the motivation and teaching signals could both be provided by other  
means. For example, the activity of striatal cholinergic neurons may inform what the  
dopaminergic neurons encode at the moment. Such a role of acetylcholine is consistent  
with the observation that the cholinergic interneurons pause when feedback is  
provided [21], with the models of intracellular pathways suggesting that the reduced  
concentration of acetylcholine is necessary for the striatal plasticity [22], and with other  
data reviewed elsewhere [20]. In this paper we assume that striatal neurons can read  
out both motivational and teaching signals encoded by dopaminergic neurons, and we  
leave the details of the mechanisms by which they can be distinguished to future work.

## Results

Following the OpAL model [8], we assume that the positive consequences of actions are  
encoded by synaptic weights within the Go pathway. More precisely, we claim that the  
typical payoff of a particular action in a particular situation is encoded in the strength  
of the connections from the cortical neurons selective for the situation to the striatal Go  
neurons selective for the action. We denote these weights by  $G$  (see Fig 1), and propose  
that after learning, the weights  $G$  represent the mean payoff for an action.

Mathematically, the collective strength of the weights  $G$  corresponds to a single,  
non-negative number. The negative consequences, on the other hand, are encoded in the  
synaptic connections of striatal No-Go neurons. We denote their weights by  $N$ , and  
propose that after learning, they represent the mean cost of an action. Just as with  $G$ ,  
we mathematically represent the collective strength of the weights  $N$  by a single,  
non-negative number.

To learn the positive and negative consequences of actions respectively, the striatal  
neurons can take advantage of the fact that these consequences typically occur in  
different moments in time. Let us consider a situation in which an animal performs an  
action that involves an effort in order to obtain a reward: Fig 2a sketches a task in  
which a rat is given the opportunity to press a lever in order to obtain a food pellet.  
Due to the effort, the instantaneous reinforcement during the course of this action is

negative at first, while pressing the lever. Then, it turns positive at the time the payoff is received. Fig 2b sketches the resulting changes in the synaptic weights. The leftmost display shows the initial weights. While making an effort to perform an action, the reward prediction error is negative. Similarly as in previous models [8, 12], we assume that the negative prediction error results in a strengthening of  $N$  (compare the red arrows in the middle and the left displays in Fig 2b). This allows the weights  $N$  to encode negative consequences. Later, reception of the payoff causes a positive prediction error, which strengthens  $G$ . This leads the weights  $G$  to encode the positive consequences. So if an experience involves both positive and negative consequences, both weights are increased during the experience (compare the right and the left displays in Fig 2b).

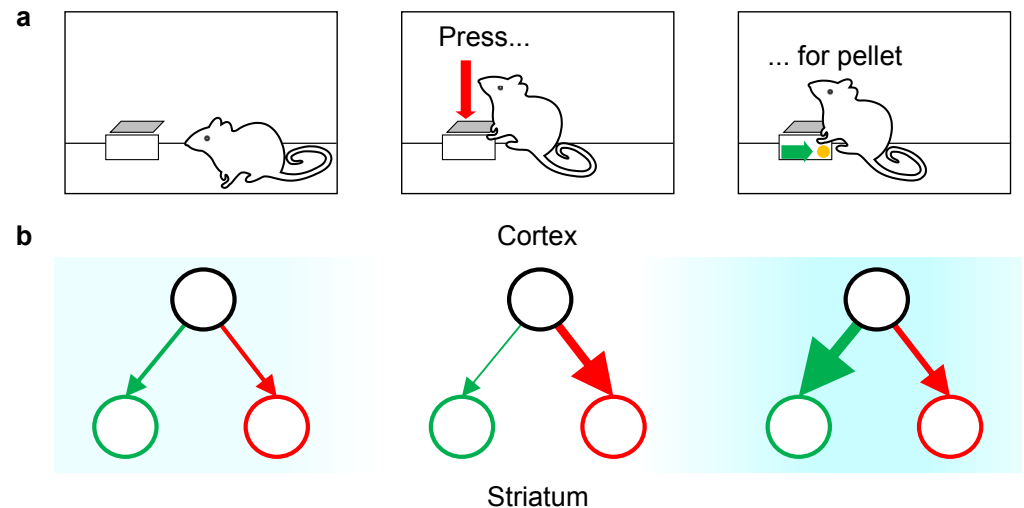

**Fig 2. Qualitative description of learning payoffs and costs.** (a) Operant conditioning chamber setup: a rat obtains a food pellet by pressing a lever. (b) Diagrams of changes in the weights  $G$  and  $N$  associated with lever pressing at each stage of the experience presented in panel (a). In all diagrams, the black circles represent the cortical neurons selective for the state (being in the operant box), and the green and red circles represent the Go and No-Go populations of striatal neurons, respectively, selective for the action (pressing lever). The thickness of the arrows linking the circles represents the connection strength between the respective neuron populations. The blue shading in the background indicates the strength of the immediate reinforcement, with color intensity proportional to the magnitude of reward.

To mathematically implement these ideas, we need to model the weights of the Go pathway  $G$ , the weights of the No-Go pathway  $N$ , and the prediction error. The reward prediction error, which we denote by  $\delta$ , quantifies the difference between the expected reward and the received reward  $r$ . If  $r$  is negative, we shall speak of cost, and when  $r$  is

positive, we shall speak of payoff. Payoff creates positive reinforcement, and thus  
attraction, whilst cost creates negative reinforcement, and thus avoidance. The expected  
reward, on the other hand, directly corresponds to the expected payoffs and costs,  
which - according to our theory - are represented by the synaptic weights  $G$  and  $N$ . We  
take the expected reward to be the average over the expected payoff and the expected  
cost. All together, we model the reward prediction error as

$$\delta = r - \frac{1}{2}(G - N). \quad (1)$$

Equipped with the quantities  $\delta$ ,  $G$  and  $N$ , we can formulate our theory of learning  
payoff and cost. To do so, we simply describe how the collective connection strengths  $G$   
and  $N$  change when a prediction error  $\delta$  is received; we use  $\Delta G$  and  $\Delta N$  to denote the  
changes in connection strengths. Note that any update only applies if the resulting  
weights are still positive - if an update would render any one weight negative, that  
weight is set to zero instead. In all other cases, we follow Mikhael and Bogacz [16] in  
prescribing

$$\Delta G = \alpha f_{\epsilon}(\delta) - \lambda G \quad (2)$$

$$\Delta N = \alpha f_{\epsilon}(-\delta) - \lambda N, \quad (3)$$

where  $\alpha$  is the learning rate,  $\epsilon$  is the slope parameter and  $\lambda$  the decay rate. The  
slope parameter  $\epsilon$  controls the strength of the nonlinearity exhibited by the function  $f_{\epsilon}$ ,  
which we introduce in Fig 3d - e. The contribution of this article is to point out that if  
 $G$  and  $N$  change according to these rules, they will eventually represent payoff and cost.

There is an intuition for each term in the rules 2 and 3. These intuitions are most  
easily gained by constructing the rules from scratch; therefore we will now retrace the  
three steps of that construction. Several models of learning in Go and No-Go neurons  
assume that the effect of the prediction error on  $G$  is opposite to its effect on  $N$  [7, 8].  
We thus start by proposing that  $\Delta G$  and  $\Delta N$  might simply be proportional to the  
prediction error and its negative, respectively. To see whether this proposal works, we  
formulate it mathematically and simulate the learning of an alternating sequence of

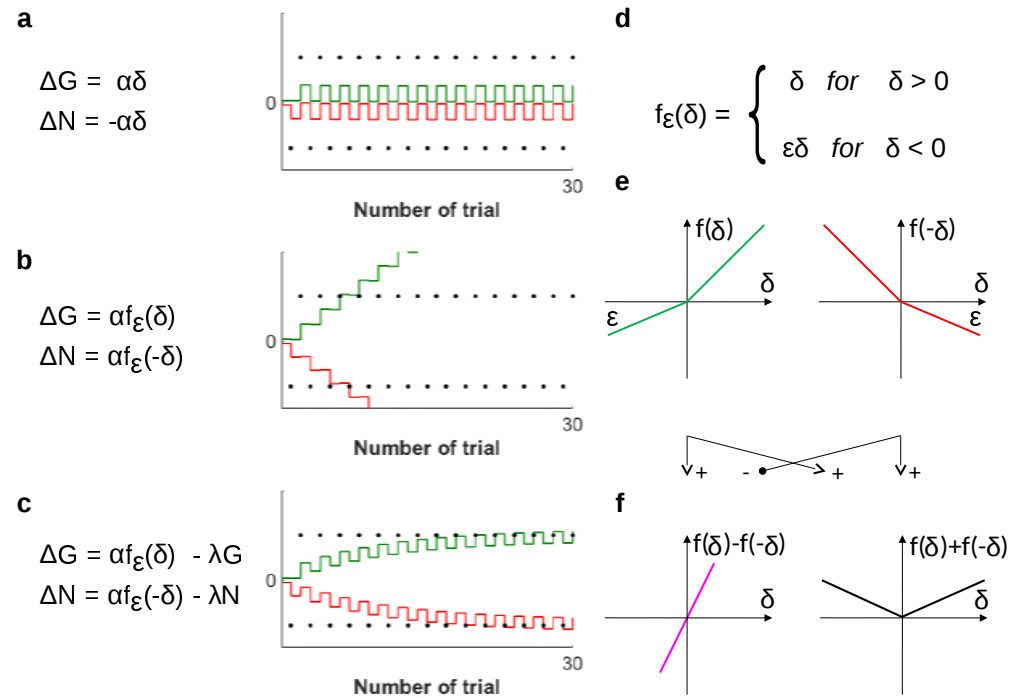

**Fig 3. The incremental construction of the learning rules.** (a) - (c) The different stages in the construction of the learning rules. All panels feature a mathematical formulation of the rules at the given stage, and a simulation of these rules. The rewards in those simulations, indicated by black dots, alternate between a fixed payoff of magnitude 20 and a fixed cost of  $-20$ . The Go weights  $G$  are depicted in green, the negative No-Go weights  $-N$  are depicted in red. The parameters used in the simulations were  $\alpha = 0.300$ ,  $\epsilon = 0.443$  and  $\lambda = 0.093$ . (d) - (f) Definition, visualization and properties of the nonlinear function  $f_{\epsilon}$ .

costs  $-n$  and payoffs  $p$ . Fig 3a shows both the mathematical formulation and the simulation. There is a problem: the strengthening of  $N$  due to negative prediction error, caused by the cost, is always immediately reversed by the following positive prediction error caused by the payoff. The same is true for the changes in  $G$ . As illustrated by the simulation, there is no net effect of learning.

To overcome this problem, we proceed by damping the impact of negative prediction errors (which are usually caused by costs) on  $G$ , and the impact of positive prediction errors on  $N$ . This is logical, since costs should not alter the estimate  $G$  of the payoffs, and vice versa. Such damping can be achieved by replacing the simple proportionality to  $\delta$  in the first proposal by a nonlinear dependence, mediated by the functions depicted in Fig 3e. We update our mathematical formulation accordingly, and again simulate the effects of the previously used reward sequence - both these steps are illustrated in Fig



3b. The simulation shows that, while producing the appropriate tendencies, these rules 138  
cause unconstrained, ongoing strengthening of both connections. Such dynamics are 139  
neither biologically plausible, nor useful to infer the actual payoff and cost. 140

Finally, to stop unconstrained strengthening and stabilize the weights, we balance 141  
growth with decay. Adding decay terms to the mathematical formulation of the rules 142  
yields their final form 2 and 3. The simulation in Fig 3c suggests that the construction 143  
was successful: the final version of the rules allows the weights to converge to  $p$  and  $n$  144  
respectively. 145

## Mathematical analysis 146

After providing an intuitive understanding of the learning rules and their mathematical 147  
formulation, we proceed to a more rigorous analytical treatment. We saw the potential 148  
of Mikhael and Bogacz' [16] rules to learn payoffs and costs. Appropriate choice of 149  
parameters is key to unlock that potential, and we shall now investigate how that choice 150  
must be made. In particular, we will derive certain relations between parameters that 151  
must be satisfied for payoff and cost to be learned. 152

Originally, the rules 2 and 3 were meant to describe learning of reward statistics. 153  
Mikhael and Bogacz [16] showed that after learning, particular combinations of  $G$  and 154  
 $N$  will encode the mean  $\mathbb{E}R$  and the mean spread  $\mathbb{E}|R - \mathbb{E}R|$  of the received rewards. 155  
For further reference, we denote these important statistics by  $q := \mathbb{E}R$  and 156  
 $s := \mathbb{E}|R - q|$ . How are the mean and the mean spread of received rewards related to 157  
payoff and cost? Consider the reward statistics of an action that reliably requires effort 158  
to produce a payoff. Repeat that action multiple times, and record all received rewards, 159  
the costs as well as the payoffs. Finally, analyze how all these received rewards are 160  
distributed. If effort was required to earn the payoff, the distribution of rewards will 161  
turn out bimodal, as schematically shown in Fig 4. It features two peaks, one centered 162  
around the mean payoff  $p$ , and one centered around the mean cost  $-n$ , respectively. Fig 163  
4 also shows the mean  $q$  and the mean spread  $s$  of that distribution. We observe that 164  
payoffs and costs are both exactly one mean spread  $s$  away from the center  $q$  of the 165  
distribution - the payoff above, and the cost below. This implies that there is, at least 166  
in this representative case, a strong connection between payoffs and costs and the 167

reward statistics:

168

$$p = q + s \tag{4}$$

$$-n = q - s \tag{5}$$

This connection allows us to set up conditions for the result of learning: if  $G$  and  $N$  are to represent payoff and cost, they must approach  $q + s$  and  $-q + s$  respectively. Equivalently, we can ask for  $1/2(G - N)$  and  $1/2(G + N)$  to approach  $q$  and  $s$  in the course of learning.

169

170

171

172

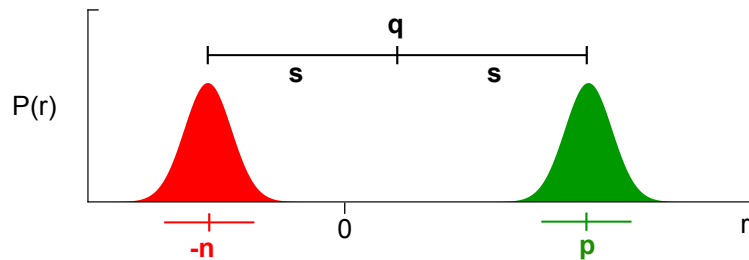

**Fig 4. The relation of reward statistics to payoff and cost.** The graph shows a representative reward distribution over the magnitude  $r$  of all received rewards. The parts of the distribution that indicate negative rewards (costs) are colored red, while the parts that indicate positive rewards (payoffs) are colored green. The mean  $q$  and the mean spread  $s$  are indicated above the distribution, the mean cost  $-n$  and the mean payoff  $p$  are indicated below the distribution.

After revealing the link between reward statistics and payoff and cost, we are ready to derive the relations necessary to learn the latter. To that end, we first determine the connection strengths  $G$  and  $N$  that result from training on stochastic rewards. Such uncertain rewards are sampled at random from a fixed distribution. Then, we implement the newly identified conditions, demanding for  $1/2(G - N)$  to approximate  $q$  and  $1/2(G + N)$  to approximate  $s$  after training is finished. From these conditions, we will be able to derive the desired parameter relations.

173

174

175

176

177

178

179

Working through these steps is simpler after changing variables from  $G$  and  $N$  to  $Q := 1/2(G - N)$  and  $S := 1/2(G + N)$  right away. We saw that the new variables  $Q$  and  $S$  have a clear computational interpretation: if learning goes as planned,  $Q$  and  $S$  track the mean  $q$  and the mean spread  $s$  of the experienced reward. To determine how  $Q$  and  $S$  change due to prediction errors  $\delta$ , we simply add and subtract the update rules

180

181

182

183

184

2 and 3. Certain convenient properties of the nonlinear functions  $f_\epsilon$  help to further  
 simplify the resulting equations: Fig 3f shows that subtracting and adding functions  
 depicted in Fig 3e give functions proportional to identity and absolute value,  
 respectively. <sup>1</sup> Exploiting these properties, we obtain

$$\Delta Q = \alpha_Q \delta - \lambda Q \quad (6)$$

$$\Delta S = \alpha_S |\delta| - \lambda S. \quad (7)$$

Here, for brevity of notation, we introduced the effective learning rates  
 $\alpha_Q = \alpha(1 + \epsilon)/2$  and  $\alpha_S = \alpha(1 - \epsilon)/2$ . Note that the changes of  $Q$  and  $S$  are  
 proportional either to the prediction error itself or to its absolute value, in contrast to  
 the changes of  $G$  and  $N$ .

Now, let us determine the strengths of the weights  $G$  and  $N$ , or equivalently of the  
 variables  $Q$  and  $S$ , after many encounters with an action. When learning the rewards of  
 a previously unknown action,  $Q$  and  $S$  typically change a lot during the first trials.  
 These changes then get smaller and smaller as more experience is integrated - the  
 learning curve plateaus. After enough trials,  $Q$  and  $S$  stop changing systematically, and  
 start to merely fluctuate about some constant values, which we denote by  $Q^*$  and  $S^*$   
 and refer to as equilibrium points. In mathematical terms, directed learning stops when  
 we may expect  $Q$  and  $S$  to remain unchanged by another trial, i.e. when  
 $\mathbb{E}(\Delta Q) = \mathbb{E}(\Delta S) = 0$ . If that stage is reached, the equilibrium points can be inferred by  
 computing the mean value of the fluctuating variables:  $Q^* = \mathbb{E}Q$  and  $S^* = \mathbb{E}S$ . With  
 these identities and the learning rules 6 and 7, we can determine the equilibrium points  
 $Q^*$  and  $S^*$ :

$$0 = \mathbb{E} \Delta Q = \mathbb{E} [\alpha_Q (R - Q) - \lambda Q] = \alpha_Q (q - Q^*) - \lambda Q^* \quad (8)$$

$$0 = \mathbb{E} \Delta S = \mathbb{E} [\alpha_S |R - Q| - \lambda S] = \alpha_S \mathbb{E} |R - Q| - \lambda S^*. \quad (9)$$

To solve these equations, we shall make the additional assumption that the

<sup>1</sup>Explicitly, one easily verifies that  $f_\epsilon(x) - f_\epsilon(-x) = (1 + \epsilon)x$  and  $f_\epsilon(x) + f_\epsilon(-x) = (1 - \epsilon)|x|$ .

fluctuations of  $Q$  about  $Q^*$  are small. This assumption is justified whenever  $\alpha$  is sufficiently small, and allows us to approximate  $\mathbb{E} |R - Q| \approx \mathbb{E} |R - Q^*|$ . Collecting all those intermediate results, we may solve 8 and 9 for the equilibrium points. The solutions read

$$Q^* = c_Q q \tag{10}$$

$$S^* \approx c_S \mathbb{E} |R - c_Q q|, \tag{11}$$

with  $c_Q = a_Q / (\alpha_Q + \lambda)$  and  $1/c_S = \alpha_S / \lambda$ . Those are the approximate values of  $Q$  and  $S$  after learning.

Next, we need to implement the conditions we inferred from Fig 4. Thanks to our choice of variables, this simply amounts to requiring that  $Q$  converge to the mean reward  $q$ , and  $S$  to the mean spread  $s$ , i.e. requiring  $Q^* = q$  and  $S^* = s$ . Inserting the approximate values 10 and 11 produced by the learning rules, we obtain

$$c_Q q = q \tag{12}$$

$$c_S \mathbb{E} |R - c_Q q| = s \tag{13}$$

These equations are central to this publication. Their left hand side represents the result of learning according to Mikhael and Bogacz' [16] rules. Their right hand side specifies what needs to be learned if  $G$  and  $N$  really represented payoffs and costs, as Collins and Frank hypothesized [8]. Equating the left and the right hand side amounts to merging both theories. It allows us to determine how the parameters would be related if both theories were exactly true: for 12 and 13 to hold,  $\alpha$ ,  $\beta$  and  $\epsilon$  must take values such that  $c_Q = 1$  and  $c_S = 1$ .

This result evokes several questions: Is it at all possible to satisfy the derived conditions? What do the conditions mean with respect to the parameters  $\alpha$ ,  $\lambda$  and  $\epsilon$ ? And finally, is there a practical way to determine sets of parameters  $\alpha$ ,  $\lambda$  and  $\epsilon$  which - at least approximately - satisfy the conditions? We discuss each of these questions in the following paragraphs.

Firstly, is it possible to satisfy  $c_Q = 1$  and  $c_S = 1$  exactly? Examining the definition  $c_Q = \alpha_Q / (\alpha_Q + \lambda)$  quickly reveals that letting  $c_Q \rightarrow 1$  would amount to letting  $\lambda \rightarrow 0$ <sup>2</sup>. Now, we derived above that after learning,  $S$  will fluctuate about its equilibrium point  $S^* \approx c_S \mathbb{E} |R - c_Q q|$  with  $c_S = \alpha_S / \lambda$ . In order to keep the equilibrium point  $S^*$  finite as  $\lambda \rightarrow 0$ , we would therefore be forced to have  $\alpha_S \rightarrow 0$  also. This, though, would pose a real problem:  $\alpha_S$  is the effective learning rate for  $S$  - having it vanish would imply stopping learning in  $S$  all together. We must conclude that strict satisfaction of the constraints  $c_Q = 1$  and  $c_S = 1$  is not compatible with non-vanishing learning rates that lead to a finite equilibrium. Specifically,  $c_Q = 1$  can only ever hold approximately if the spread  $s$  is to be learned in finite time. Nevertheless, no such problem arises when  $c_S$  is set to 1 exactly.

Now, what do the constraints  $c_Q \approx 1$  and  $c_S = 1$  mean in terms of the parameters  $\alpha$ ,  $\lambda$  and  $\epsilon$ ? In the previous paragraph, we saw that  $c_Q \approx 1$  is equivalent to  $\lambda / \alpha_Q \approx 0$ . Since both  $\lambda$  (a decay constant) and  $\alpha_Q$  (an effective learning rate) are inherently positive, we may rewrite this as  $\lambda / \alpha_Q \ll 1$ . Inserting the definition  $\alpha_Q = \alpha(1 - \epsilon) / 2$  immediately yields

$$2\lambda \ll \alpha(1 + \epsilon) \quad (14)$$

The other condition,  $c_S = 1$ , is easily translated analogously. We need only use the definitions  $c_S = \alpha_S / \lambda$  and  $\alpha_S = \alpha(1 - \epsilon) / 2$  to obtain

$$2\lambda = \alpha(1 - \epsilon). \quad (15)$$

Equations 14 and 15 constitute the exact relations between the parameters  $\alpha$ ,  $\gamma$  and  $\epsilon$  that need to hold for payoffs and costs to be estimated accurately. They cannot be further simplified, but we may use them to gain some more insight into the required magnitudes of the individual parameters: by substituting  $2\lambda$  according to Eq 15 on the right hand side of Eq 14, one quickly reaches the conclusion that  $\epsilon \approx 1$ . Reinserting this into Eq 14 yields  $\lambda \ll \alpha$ . In conclusion, we found that it is necessary (though not sufficient) for accurate learning of payoffs and costs to maintain a small, but non

<sup>2</sup>Technically, it amounts to  $\lambda / \alpha_Q \rightarrow 0$ . However,  $\alpha_Q$  is an effective learning rate, and so must take values smaller than one. Thus, we really need to let  $\lambda \rightarrow 0$

vanishing nonlinearity  $\epsilon$  in the transmission of the prediction error signal, as well as a  
non vanishing decay rate  $\lambda$ , which is much smaller than the learning rate  $\alpha$ .

Finally, how can such parameters  $\alpha$ ,  $\lambda$  and  $\epsilon$  practically be determined? To  
implement the conditions  $c_Q \approx 1$  and  $c_S = 1$ , one can for instance express  $\lambda$  and  $\epsilon$  in  
terms of  $\alpha$ ,  $c_Q$  and  $c_S$ . It is straight forward to invert the definitions of  $c_Q$  and  $c_S$  in  
order to yield  $\epsilon = (1 - c_S(1/c_Q - 1))/(1 + c_S(1/c_Q - 1))$  and  $\lambda = \alpha(1 - \epsilon)/(2c_S)$ . Then,  
one chooses  $\alpha$  freely at one's convenience, and  $c_Q$  and  $c_S$  close (or, in case of  $c_S$ , equal)  
to one. Importantly,  $c_Q$  must be chosen smaller than one to result in a positive  $\lambda$ . From  
these choices, one finally obtains  $\epsilon$  and  $\lambda$  to work with the chosen  $\alpha$ . Our simulations  
suggest that even values such as  $c_Q = 0.7$  and  $c_S = 0.9$ , in combination with a learning  
rate of, say  $\alpha = 0.3$ , are close enough to one to allow reasonably accurate estimations of  
payoff and cost. This can be seen in Fig 3: the simulations shown in there used those  
exact settings, which equivalently means that  $\epsilon = 0.443$  and  $\lambda = 0.093$ .

In summary, we used a statistical argument - the connection between payoffs and  
costs and the reward statistics - to determine conditions under which payoffs and costs  
can be learned with the update rules 2 and 3.

## Deterministic reward sequences

In the preceding section, we derived relations that are necessary for successful learning  
of payoff and cost. If rewards are awarded stochastically, those relations are also  
sufficient for successful learning. But what happens to the weights  $G$  and  $N$  if the  
received rewards follow a strong pattern? Assume, for instance, that an action reliably  
yields a fixed cost  $-n$  followed by a fixed payoff  $p$ . Under which additional conditions  
do  $G$  and  $N$  then still reflect the magnitudes of payoff and cost after learning?

To answer that question, we must again determine the connection strengths that  
result from experiencing the action time and again. Now, we do not have to rely on a  
probabilistic treatment - when the pattern of the rewards is fully known, it is possible to  
determine the evolution of  $G$  and  $N$  exactly. As in the previous section, we will  
concentrate on the result of learning rather than on its dynamics. Here, this amounts to  
determine the fixed points of the learning rules. These fixed points are simply those  
values of  $G$  and  $N$  (or equivalently of the alternative variables  $Q$  and  $S$  we defined

above) that are invariant under the updates caused by the action. We denote the fixed points by  $G^*$  and  $N^*$ , or  $Q^*$  and  $S^*$ . During learning, the variables converge to their respective fixed points, and cease to change notably once they arrive in their vicinity.

First, we focus on determining the fixed point of  $Q$ . Note that each encounter with the action yields two updates of  $Q$ : one due to the cost and one due to the payoff. Mathematically, we can formulate this as

$$Q_{\text{after action}} = Q_{\text{before action}} + (\Delta Q)_{\text{cost}} + (\Delta Q)_{\text{payoff}}. \quad (16)$$

To find  $Q^*$ , demand that these successive updates have no net effect on  $Q$ : If  $Q_{\text{after action}}$  equals  $Q_{\text{before action}}$ , then  $Q_{\text{before action}}$  can rightfully be called fixed point. If this is so, the two updates must have canceled each other:

$$(\Delta Q)_{\text{cost}} + (\Delta Q)_{\text{payoff}} = 0$$

This condition, in combination with the update rules 2 and 3, allows to determine  $Q^*$  in terms of  $p$ ,  $n$  and the parameters  $\alpha$ ,  $\epsilon$  and  $\lambda$ . One substitutes  $(\Delta Q)_{\text{cost}}$  and  $(\Delta Q)_{\text{payoff}}$  according to the update rules (note that the  $Q$  entering the second update had already been changed by the first update), and then solves the equation for  $Q$ . A straight forward calculation yields

$$Q^* = \frac{1}{2 - \alpha_Q - \lambda} (n(\alpha_Q + \lambda - 1) + p) \quad (17)$$

where  $\alpha_Q = \alpha(1 + \epsilon)/2$ . Now, recall that the definition of  $Q$  in terms of  $G$  and  $N$  is  $Q = 1/2(G - N)$ , and that true payoffs and costs of in this model are  $p$  and  $n$ . If  $G$  and  $N$  represented the true payoffs and costs after learning, it must be true that  $G^* \approx p$  and  $N^* \approx n$ , and thereby

$$\frac{1}{2 - \alpha_Q - \lambda} (n(\alpha_Q + \lambda - 1) + p) \approx \frac{1}{2} (p - n). \quad (18)$$

Just as equations 12 and 13, this equation is an interface between the results of Mikhael and Bogacz' [16] update rules on the left hand side, and Collins and Frank's hypothesis [8] on the right hand side. For both sides to agree, we must have

$$\alpha_Q + \lambda \approx 0. \tag{19}$$

This is a novel condition for learning the correct magnitudes of payoffs and costs from a deterministic reward pattern. The definition of  $\alpha_Q$  and the previously derived conditions 14 and 15 may be used to transform this novel condition into the simpler form  $\alpha \ll 1$ .

Next, we repeat the same analysis for  $S$ . Since we search for additional conditions on the parameters, we are free to use the original conditions 14 and 15 to simplify our calculations. The only complication we encounter is the appearance of  $Q$  in the update rules of  $S$ , which we resolve by substituting  $Q$  with  $Q^*$ , acknowledging that the fixed points of  $S$  and  $Q$  depend on each other. We arrive at

$$S^* \approx \frac{1}{2}(p + n). \tag{20}$$

Again, using the definition  $S = 1/2(G + N)$  allows to compare the result of learning with the the strengths required to represent payoffs and costs. We immediately find that  $G^* \approx p$  and  $N^* \approx n$  already hold. Thus, 19 is the only additional condition for successful learning of payoff and cost from rewards that follow a strong pattern.

From the results presented in this section, we conclude that the learning rules 2 and 3 facilitate learning of the magnitudes of fixed payoffs and costs that occur reliably one after the other. However, we also saw that this is only true if 19 holds in addition to the conditions that we derived in the previous section.

## Summary of analytic results

The analysis above revealed the conditions under which the striatal plasticity rules 2 and 3, put forward by Mikhael and Bogacz [16], could serve the hypothetical function of the striatum proposed by Collins and Frank [8]: to represent the magnitudes of the payoffs and costs of actions. We identified the conditions in two different paradigms: first, we investigated learning from purely stochastic rewards sampled from a fixed distribution. Then, we considered a deterministic pattern of rewards. We obtained two key results:

- Consider a reward distribution - obtained from multiple encounters with an action



- that is shaped by payoffs and cost, as the one shown in Fig 4. If trained on  
rewards sampled from that distribution, the plasticity rules 2 and 3 will enable  
learning of the mean payoffs and costs if

$$2\lambda \ll \alpha(1 + \epsilon) \quad (21)$$

$$2\lambda = \alpha(1 - \epsilon) \quad (22)$$

hold. These conditions imply, but do not follow from, a non-vanishing but small  
nonlinearity in the transmission of the prediction error, and a non-vanishing but  
small<sup>3</sup> decay of the connection weights.

- If trained on a pattern of rewards that alternates between payoffs of magnitude  $p$   
and costs of magnitude  $n$ , the plasticity rules 2 and 3 will capture the those exact  
payoffs and costs if, in addition to 21 and 22,

$$\alpha \ll 1 \quad (23)$$

holds. In words, unbiased learning of payoffs and costs in deterministic scenarios  
explicitly requires a small learning rate  $\alpha$ .

## Simulations of learning

The previous sections revealed what to expect from training the learning rules 2 and 3  
on certain types of reward. Specifically, we investigated the connection strengths  $G$  and  
 $N$  after many experiences of either totally predictable or totally random rewards. In  
this section, we aim to confirm and extend those results using numerical simulations  
rather than analytic methods.

Fig 5 shows the results of simulating the gradual change of connection weights in  
four different tasks. In all those simulations,  $G$  and  $N$  change according to the learning  
rules 2 and 3. The parameters we used roughly fulfill the conditions 12 and 13 for  
learning of the correct magnitudes of payoffs and costs<sup>4</sup>.

<sup>3</sup>A small decay is characterized by a decay rate  $\lambda$  which is small compared to the learning rate  $\alpha$ .

<sup>4</sup>The parameters are also chosen to facilitate quick convergence. The values presented in Fig 5a

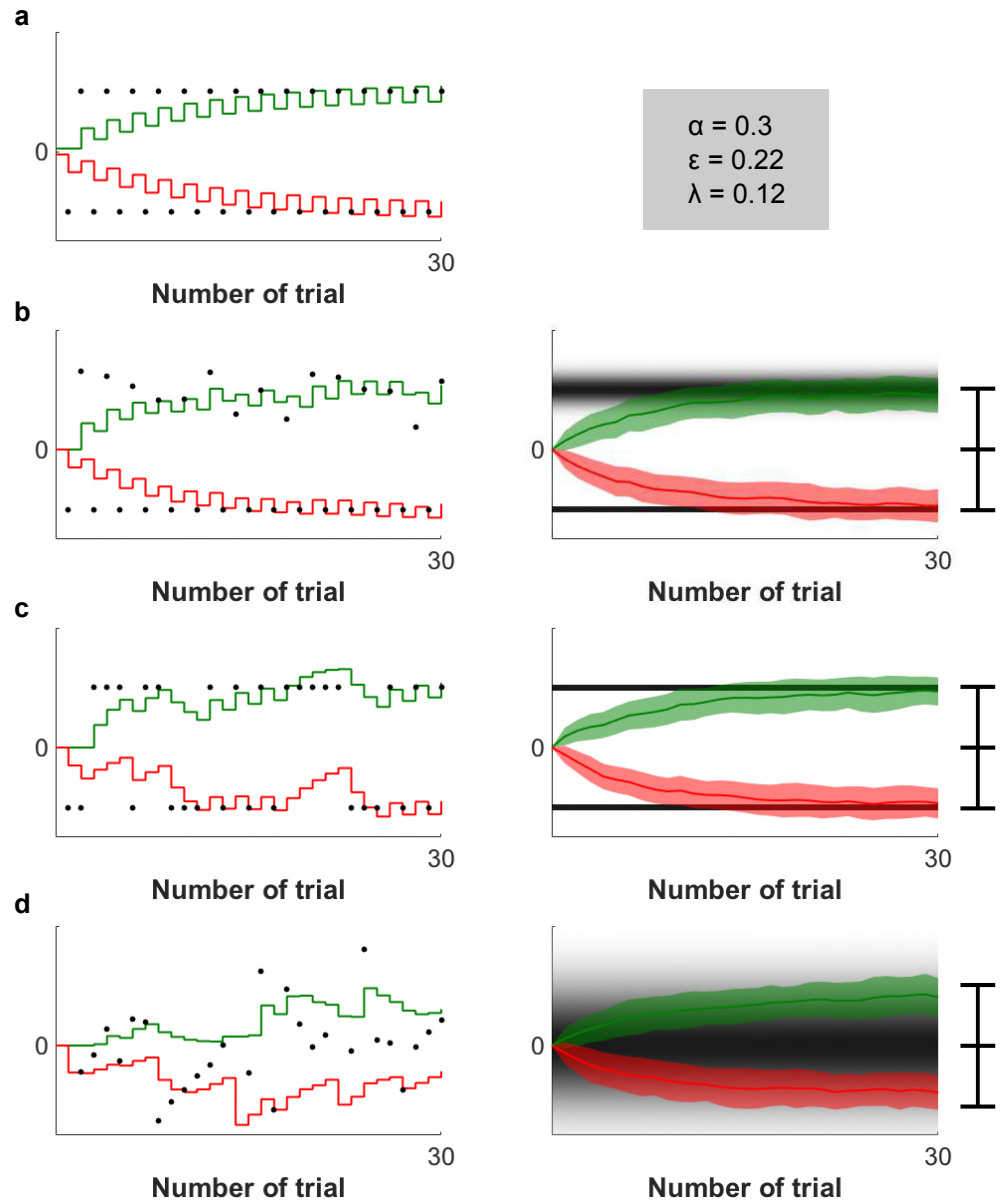

**Fig 5. Simulations of learning.** In all graphs, the collective strength  $G$  of the Go weights is depicted in green, while the negative collective strength  $-N$  of the No-Go weights is depicted in red. The received rewards are indicated by black dots in the panels on the left, while the underlying reward distributions are represented by gray background shadings in the panels on the right. Each simulation shows how  $G$  and  $N$  change due to the reception of 30 prediction errors. Panel (a) contains a simulation based on predictable, alternating rewards. It also contains the parameter values used for the simulations. Panels (b) to (d) show both single and averaged simulations of stochastic rewards. The shaded areas around the averages of  $G$  and  $N$  in the right column indicate one standard deviation. The bars behind the averaged simulations indicate the mean and mean spreads of the respective reward distributions.

mirror that compromise.

The simulation in Fig 5a is based on a repeating an action that reliably results in a cost  $-n$ , followed by a payoff  $p$ . An analytic treatment of that case can be found in the previous sections. Both weights constantly oscillate due to the alternation of payoff and costs. This oscillating behavior is superimposed with learning curves that take the weights from their initial values towards the magnitudes of the payoffs and costs respectively. After 30 trials,  $G$  and  $N$  represent good approximations of  $p$  and  $n$ .

Fig 5b is similar to Fig 5a, with a slight variation: Just as in Fig 5a, payoffs and costs alternate reliably. But while the cost is again held constant at  $-n$ , this time the payoff  $P$  is sampled from a fixed distribution in each trial. Thus, the task includes both stochastic and deterministic components: each repetition of an action results in a fixed cost, which is followed by an uncertain reward. The depicted simulations show that under such conditions,  $N$  eventually represents the cost  $n$ , while  $G$  converges towards the mean payoff  $\mathbb{E}P$ .

Finally, panels 5c and 5d contain simulations of repeated actions with rewards drawn at random from fixed distributions. We simulate the experience resulting from such actions by sampling rewards from a fixed distribution on each trial. The stochastic nature of this procedure causes the evolution of the weights  $G$  and  $N$  to be different each time the simulation is run. To overcome that effect and segregate random fluctuations from reproducible effects, we collect and average a large number of runs. Each row in Fig 5b - d contains both a single run of the simulation and an average over 500 successive runs. In the above sections, we proved that in purely stochastic tasks, the weights would approximate key statistics of the reward distribution after convergence. Those statistics are indeed approximated in the simulations, confirming the results of the analytic treatment above.

## Simulations of the effect of dopamine depletion

In the previous sections, we focused on the change of the synaptic weights associated with a single action during the accumulation of experience. In this section, we redirect our attention. Instead of considering one action during learning, we now consider multiple actions after learning, and ask: can effects of dopamine depletion on choice behavior be explained in terms of payoffs versus costs?

In a classic experiment illustrated in Fig 6a, rats were given a choice between pressing a lever in order to obtain a nutritious pellet, and freely available lab chow [23]. Normal animals were willing to work for pellets, but after dopamine depletion they were not any more willing to make an effort and preferred a less valuable but free option. Collins and Frank [8] provided a mechanical explanation for this surprising effect. The theory proposed in this paper accounts for it in a conceptually similar but slightly simpler way. Here, we explain our modeling of the experiment, and then describe the simulations - the differences to the account of OpAL model are presented in Discussion.

To model the experiment, we need to specify how the striatal weights  $G$  and  $N$  and the motivation signal affect the output of the basal ganglia system, and how that output then affects choice. We refer to the output of the basal ganglia as the thalamic activity, denoted by  $T$ .  $T$  depends on the cortico-striatal weights  $G$  and  $N$ , and dopaminergic motivation signal denoted by  $D$ . Even though this relationship might admittedly be complex, we restrict ourselves to just capture the signs of the dependencies by using a linear approximation:

$$T = DG - (1 - D)N \quad (24)$$

In the above equation, the first term  $DG$  corresponds to input from the striatal Go neurons. This term is positive, because the projection from striatal Go neurons to the thalamus involves double inhibitory connections (see Fig 1) resulting in an overall excitatory effect. The activity of the Go neurons depends on synaptic weights  $G$ . We assume that their gain is modulated by the dopaminergic input  $D$ , based on the observation of an increased slope of the firing-input relationship in the presence of dopamine [24]. The second term  $-(1 - D)N$  corresponds to input from the striatal No-Go neurons. It has a negative sign because the projection from the No-Go neurons to the thalamus includes three inhibitory connections. The activity of the striatal No-Go neurons depends on their synaptic weights  $N$ , and we assume that their gain is reduced by dopamine, so the synaptic input is scaled by  $(1 - D)$ . In Eq (24), we assume that  $D \in [0, 1]$ , and that the value of  $D = 0.5$  corresponds to a baseline level of dopamine for which both striatal populations equally affect the thalamic activity. Although arising from a slightly different induction, the action value defined by Eq 24 is directly

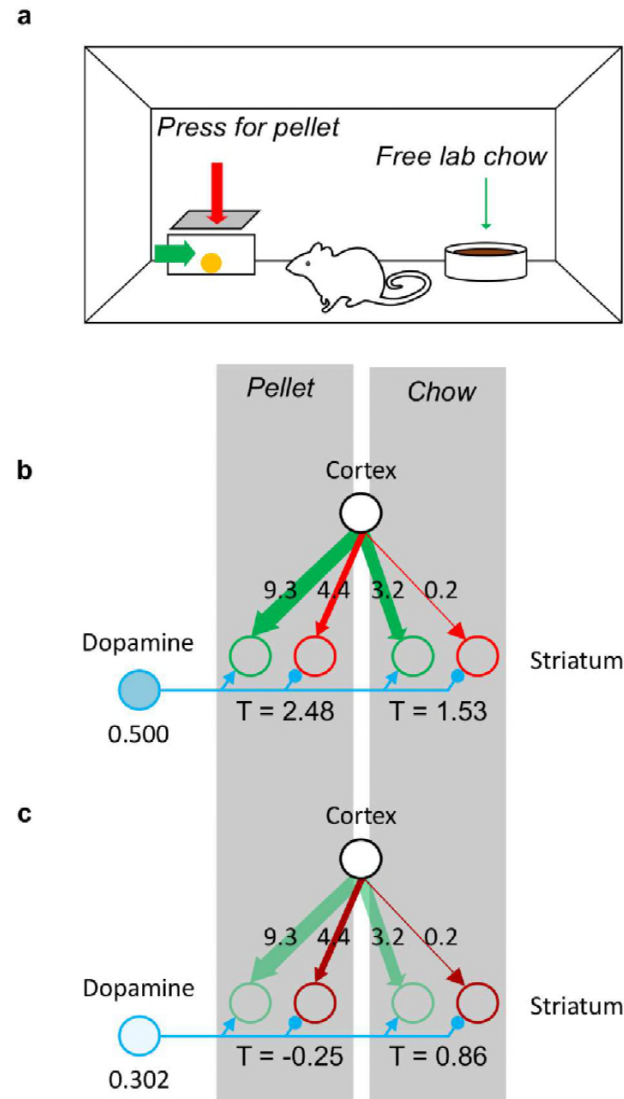

**Fig 6. Effects of dopamine depletion on the willingness to exert effort.** (a) Schematic illustration of the experimental setup. (b) Action selection in dopamine intact state. Green and red circles on the left denote striatal Go and No-Go neurons associated with pressing the lever, while the green and red circles on the right denote the neurons associated with approaching free food. The strength of the synaptic connections, which result from simulated learning, are indicated by the thickness of the arrows, and labels. The parameters used for the simulations were obtained through a fit of the model to the experimental data. The blue circle represents a population of dopaminergic neurons, and its shading indicates the level of activity. (c) Action selection in dopamine depleted state. The notation is the same as in panel B, but additionally the light green color of the connection of the Go neurons indicates that their gain has been reduced, while the dark red color of the connections of the No-Go neurons symbolizes an increased gain.

proportional to the action value proposed by Collins and Frank, which is defined by Eq 4 409  
of their publication [8]:  $Q \propto \beta_G G - \beta_N N$ . One easily verifies the direct proportionality 410

of the two expressions by rewriting  $D = 1/2 (1 + (\beta_G - \beta_N) / (\beta_G + \beta_N))$ . 411

How does thalamic activity affect choice? Again, we use a very simple dependency 412  
to capture the key aspects of that relationship: In our model of the experiment, we 413  
calculate the thalamic activity for each option. Then, we add some random noise 414  
independently to each option. Finally, all options with negative noisy thalamic activity 415  
are discarded, and the option with the highest noisy thalamic activity is chosen. If the 416  
noisy thalamic activity is negative for all available options, no choice will be made; the 417  
model defaults to staying inactive. 418

Often in similar situations, the softmax rule is the preferred choice procedure. 419  
According to that rule, one should first transform the set of different action values (or 420  
thalamic activities in this case) into a probability distribution over the available actions, 421  
by use of the softmax function. Then, one should sample an action from that 422  
distribution, and declare it the choice of that trial. Collins and Frank's OpAL model [8] 423  
exemplifies the use of the softmax rule. 424

We deliberately decided against this conventional approach and in favor of the above 425  
described procedure to accommodate a certain feature of the data presented in [23]: 426  
The dopamine depleted group of rats differed from the control group not only in their 427  
willingness to work for food, but also in their overall food consumption. The dopamine 428  
depleted rats consumed less food in total (see Fig 7c). We can hope to capture this 429  
effect with our model, since it allows for the possibility to make no choice at all, and 430  
thus consume neither of the food items. A softmax decision rule, on the other hand, 431  
forces a choice on each trial, and must therefore always lead to the same number of 432  
consumed food items. 433

Fig 6b illustrates how the model can account for the behaviour when the dopamine 434  
level has a normal baseline value. In the figure, the strength of the cortico-striatal 435  
connections is denoted by the labels and the thickness of arrows. Pressing the lever 436  
gives a high payoff, so the weights of Go neurons selective for this action are strong, but 437  
it also has a substantial cost, so the No-Go weights are also present. On the other hand, 438  
the free food is not particularly nutritious so the Go weights are weak, and there is no 439  
cost, so the No-Go weight is negligible. When the dopamine level is at baseline, the 440  
positive and negative consequences are weighted equally, so the thalamic neurons 441  
selective for pressing the lever have overall higher activity, which ultimately leads to a 442

high likelihood for this action to be chosen over the free option. By contrast, Fig 6c shows that when the dopamine level is reduced, costs are weighted more than payoffs, and the thalamic activity associated with pressing the lever drastically decreases. Approaching free food has only negligible cost; therefore, the activity of thalamic neurons selective for this option is now higher, and this action is overall more likely to be chosen.

A quantitative fit of our model to Salamone et al.'s experimental results [23] is illustrated in Fig 7. The panels on the left side in Fig 7 summarize experimental data: the top-left display corresponds to a condition in which both high-valued pellets and the low-valued lab chow were freely available. In this case, the animals preferred pellets irrespectively from dopamine level. The bottom-left panel corresponds to the condition in which the animal had to press a lever in order to obtain a pellet, and as mentioned before, after injections of a dopamine antagonist they started to prefer the lab chow.

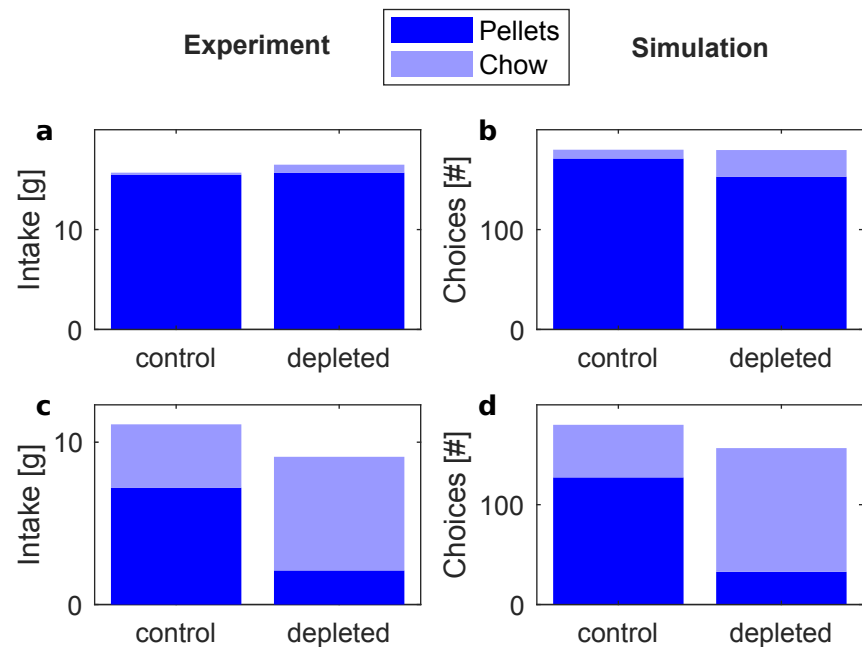

**Fig 7. Frequency of choosing pellets and lab chow in dopamine intact (dark blue) and dopamine depleted (light blue) states.** The top displays (a) and (b) correspond to a condition with free pellets, while the bottom displays (c) and (d) correspond to a condition where pressing a lever was required to obtain a pellet. The left displays (a) and (c) re-plot experimental data. The values in those displays were taken from Figures 1 and 4 respectively in the paper by Salamone et al. [23]. The right displays (b) and (d) show the results of simulations. The parameters used to simulate learning were  $\alpha = 0.1$ ,  $\epsilon = 0.6327$  and  $\lambda = 0.0204$ .

In our model of the experiment, we run through a sequence of trials mimicking those illustrated in Fig 6: on each trial, the model makes a choice between two actions - pressing a lever or approaching lab chow - or remains inactive. Before the main experiments, the animals were trained to press lever to obtain reward and were exposed to the lab chow [23]. To parallel this in simulations, the model was first trained such that it experienced each action a number of times, received corresponding payoffs and costs, and updated its weights according to equations 2 and 3. The weights resulting from that learning are reported in Fig 6b and Fig 6c. Then, the model was tested with baseline and reduced dopaminergic motivation signal. As described in Materials and Methods, the parameters of the model were optimized to match experimentally observed behavior. As shown in the right displays in Fig 7, the model was able to reproduce the observed pattern of behavior. This illustrates model's ability to capture both learning about payoffs and costs associated with individual actions and the effects of the dopamine level on choices.

### An actor-critic variation

So far, we assumed that the reward prediction is computed by the same striatal neurons that encode the payoffs and costs of actions. Only one network was involved: that which is responsible for the choice of action. We refer to such a network as 'actor' in the remainder of this exposition. In this section, we look at how the theory described above generalizes to the actor-critic framework [26]. That framework assumes that the reward prediction is not computed by the actor, but by a separate group of striatal patch neurons called the 'critic'. More formally, the purpose of that critic is to learn the value  $V$  of the current state.

One way to generalize our theory in this direction is to keep the actor network unaltered, while substituting it with a similar critic network that learns by the very same rules 2 and 3:

$$\Delta G_{critic} = \alpha f_{\epsilon}(\delta) - \lambda G_{critic} \quad (25)$$

$$\Delta N_{critic} = \alpha f_{\epsilon}(-\delta) - \lambda N_{critic} \quad (26)$$



The crucial difference between the actor and the critic is that the critic network is not selective for the action, but only for the state. It thus learns the value of a state irrespective of the actions chosen. Importantly, the critic is in charge of supplying the reward predictions. Those predictions are compared to the actual outcomes to produce the reward prediction errors  $\delta$  from which both networks learn.

We take the state value to be encoded in the difference of  $G_{critic}$  and  $N_{critic}$ :  $V_{critic} = 1/2 (G_{critic} - N_{critic})$ . The change of the state value on each trial can be obtained by subtracting equations 25 and 26:

$$\Delta V_{critic} = \alpha \frac{(1 + \varepsilon)}{2} \delta - \lambda V_{critic} \quad (27)$$

The prediction error  $\delta$  - which teaches the actor as well - is the difference between the obtained reward  $r$  and the reward prediction by the critic:

$$\delta = r - V_{critic} \quad (28)$$

What would be learned with that architecture? If the same action is selected on each trial, the actor will learn in exactly the same way as the critic. Then, the prediction error in the actor-critic model is the same as in the actor-only model described above, and the weights of the actor in the actor-critic model converge to exactly the same values as for the actor-only model. However, this reasoning does not seem to apply if more than one action is available: empirically, animals then select the actions that maximize their rewards in their own perception. In the process of learning, they will likely sample all available actions.

If such behavior generates input for an actor-critic model, the critic will integrate the experience of all those trials, and will thus represent a mixture of the expected rewards associated with the available actions. This generally interferes with correct learning of the payoffs and costs of the different actions. However, there is a caveat: one of the available actions will eventually prove most useful; as soon as the animal has determined that best action, it will select it in the majority of cases. That, in turn, forces the critic into mainly representing the expected reward of this best action. As a final consequence, also payoff and cost of that best action are inferred correctly.

We confirmed the conclusions of this discussion empirically for the model specified

above: in Fig 8, we present simulations of a task in which the subject must choose  
 between two actions. Both actions reliably yield a constant cost followed by a constant  
 payoff each time they are selected. One of the actions is unambiguously superior to the  
 other: its payoff is larger and the its cost is lower.

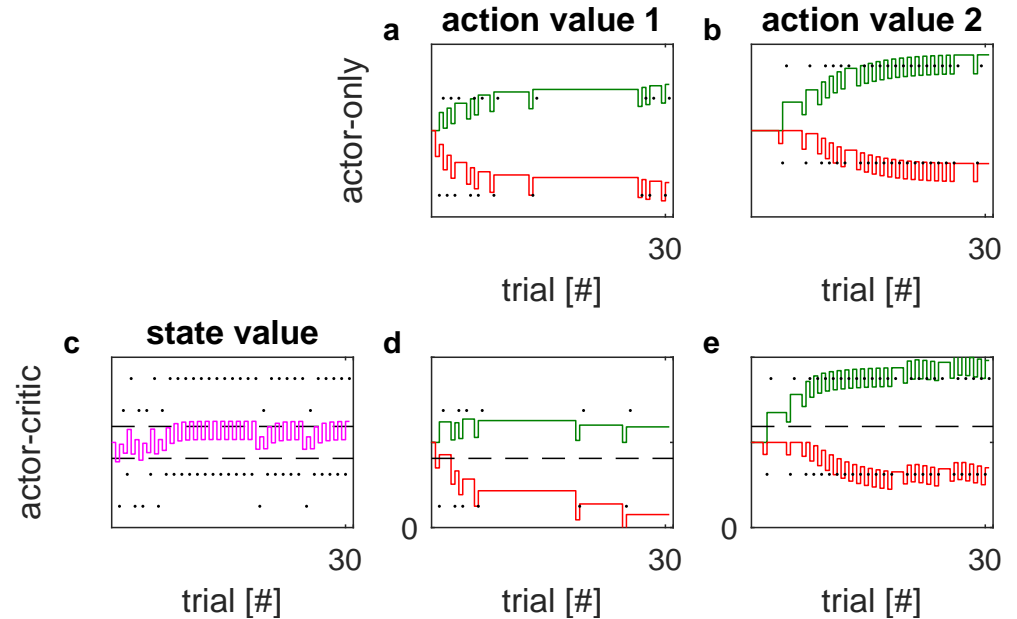

**Fig 8. Actor-only in comparison with actor-critic learning.** The columns labeled with ‘action value 1’ and ‘action value 2’ show the simulated evolution of the collective synaptic weights  $G$  and  $N$  of the actor network over 30 successive trials. The weights  $G$  are drawn as solid green lines, the negative weights  $N$  are drawn as solid red lines. The rewards obtained by choosing the respective actions are indicated by black dots. For the actor-critic simulations (second row), we additionally provide the evolution of the state value in panel c. There, the state value  $V_{critic}$  is represented by a solid purple line. The expected rewards of both actions are indicated by dashed horizontal lines. The parameter settings used in these simulations were  $\alpha = 0.4$ ,  $\epsilon = 0.519$ ,  $\lambda = 0.1013$  and  $\beta = 0.9$ . The same set of parameters was used for both the actor-only and the actor-critic model.

Both an actor-only model and an actor-critic model interacted with that task. On  
 each trial, an action was selected by sampling from a softmax distribution over all  
 available actions: the probability of choosing action  $a$  was proportional to  $\exp(\beta Q_a)$ ,  
 where  $Q_a = 1/2 (G_a - N_a)$  was the action value, and  $\beta$  was the softmax temperature.  
 Fig 8 shows the temporal evolution of the involved synaptic weights over the course of  
 learning. Panels 8a and 8b depict the actor-only evolution of the weights  $G$  and  $N$  that  
 encode the payoffs and costs of of actions 1 and 2, respectively. For both actions,  
 payoffs and costs are learned correctly. Learning is notably slower for action 1. This is

easily explained: action 1 is the worse of the two options, and thus chosen much less frequent. In contrast, the actor-critic driven evolution of the same weights presented in panels 8d and 8e leads to a correct estimate of the payoff and cost only for the superior action 1. Learning is impaired for the inferior action 2, as anticipated in the qualitative discussion above. The state value, presented in panel 8c, provides further confidence in the validity of that discussion: Instead of encoding a mixture of the values of all available actions, it converges to the value of the superior action, indicated by the higher of the two dashed lines.

## Discussion

This article describes how the positive and negative consequences of actions can be separately learned on the basis of a single teaching signal encoding reward prediction error. In this section we relate the theory with data and other models, state experimental predictions, and highlight the directions in which the theory needs to be developed further.

### Relationship to experimental data

The model described in this paper was shown in simulations to avoid action requiring effort when the motivational signal was reduced. The unwillingness to make an effort for reward in dopamine depleted state has also been observed in other paradigms: During a choice in a T-maze, dopamine depleted animals were less likely to go to an arm with more pellets behind the barrier, but rather chose the arm with easily accessible but fewer pellets [27]. Parkinson's patients were not willing to exert as much physical effort by squeezing a handle in order to obtain reward as healthy controls, especially if they were off medications [28]. These effects can be explained in an analogous way [8] by assuming that in the dopamine depleted state the effort of crossing the barrier or squeezing a handle is weighted more, resulting in lower activity of thalamic neurons selective for this option. Both in OpAL and the model proposed here, reducing the dopamine level reduces the tendency to choose actions involving costs, and thus changes preferences.

Let us now consider how the weight changes in our model relate to known data on

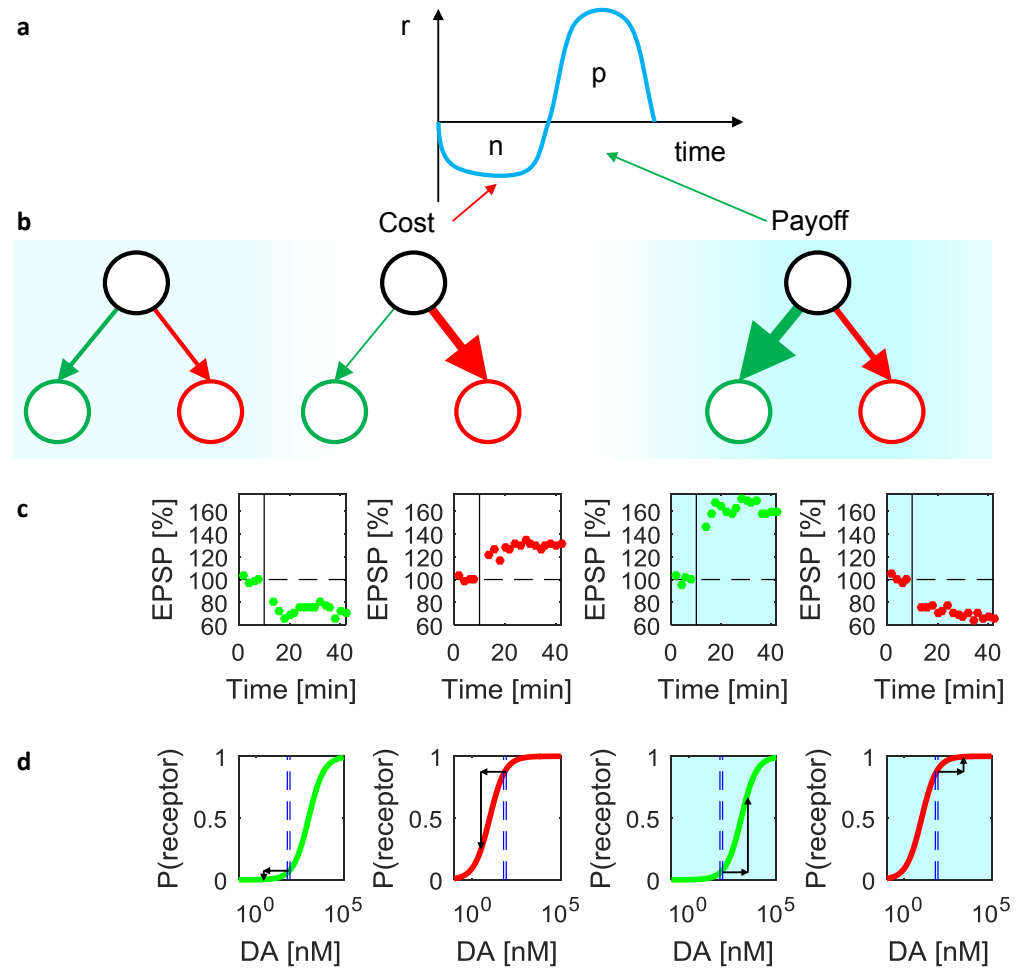

**Fig 9. Relationship of learning rules to synaptic plasticity and receptor properties.** (a) Instantaneous reinforcement  $r$  when an action with effort  $n$  is selected to obtain payoff  $p$ . (b) Cortico-striatal weights before the action, after performing the action, and after obtaining the payoff. Red and green circles correspond to striatal Go and No-Go neurons, and the thickness of the lines indicates the strength of synaptic connections. The intensity of the blue background indicates the dopaminergic teaching signal at different moments of time. (c) The average excitatory post-synaptic potential (EPSP) in striatal neurons produced by cortical stimulation as a function of time in the experiment by [11]. The vertical black lines indicate the time when the synaptic plasticity was induced by successive stimulation of cortical and striatal neurons. The amplitude of EPSPs is normalized to the baseline before the stimulation indicated by horizontal dashed lines. The green and red dots indicate the EPSPs of Go and No-Go neurons respectively. Displays with white background show the data from experiments with rat models of Parkinson's disease, while the displays with blue background show the data from experiments in the presence of corresponding dopamine receptor agonists. The four displays re-plot the data from Figures 3E, 3B, 3F and 1H in the paper by [11]. (d) Changes in dopamine receptor occupancy. The green and red curves show the probabilities of D1 and D2 receptor occupancies in a biophysical model of [29]. The two dashed blue lines in each panel indicate the levels of dopamine in dorsal (60 nM) and ventral (85 nM) striatum estimated on the basis of spontaneous firing of dopaminergic neurons using the biophysical model [30]. Displays with white and blue backgrounds illustrate changes in receptor occupancy when the level of dopamine is reduced or increased respectively.

synaptic plasticity in the striatum. Fig 9b illustrates the weight changes when an animal 550  
performs an action involving a cost  $n$  in order to obtain a payoff  $p$  (Fig 9a), e.g. pressing 551  
a lever in order to obtain a pellet. The direction of changes in  $G$  and  $N$  depending on 552  
the sign of  $\delta$  are consistent with the changes of synaptic weights of Go and No-Go 553  
neurons observed at different dopamine concentrations. Fig 9c shows experimentally 554  
observed changes in synaptic strengths when the level of dopamine is low (displays with 555  
white background) and in the presence of agonists (blue background) [11]. Note that 556  
the directions of change match those in the corresponding displays above, in Fig 9b. 557

These directions of changes in striatal weights are also consistent with other models 558  
of the basal ganglia [8, 12], but the unique prediction of the rules described in this paper 559  
is that the increase in dopaminergic teaching signal should mainly affect changes in  $G$ , 560  
while the decrease in dopamine should primarily affect  $N$ . Thus, the dopamine 561  
receptors on the Go and No-Go neurons should be most sensitive to increases and 562  
decreases in dopamine level respectively. This matches with the properties of these 563  
receptors. The D2 receptors on No-Go neurons have a higher affinity and therefore are 564  
sensitive to low levels of dopamine compared to D1 receptors on Go neurons [31]. This 565  
property is illustrated in Fig 9d where the green and red curves show the probabilities 566  
of D1 and D2 receptors being occupied as a function of dopamine concentration. The 567  
blue dashed lines indicate the levels of dopamine in the striatum predicted to result 568  
from spontaneous firing of dopaminergic neurons [30]. At these levels most D1 receptors 569  
are deactivated. Thus the D1 receptor activation will change when the dopamine goes 570  
up, but not when it goes down, as indicated by the black arrows. This is consistent with 571  
the stronger impact of positive prediction errors on the weight changes of the Go 572  
neurons implemented in Equation 2. By contrast, the D2 receptors are activated at 573  
baseline dopamine levels, so their activation is affected by the decreases in dopamine 574  
level but little by increases, in agreement with stronger impact of positive prediction 575  
errors on the No-Go neurons implemented in Equation 3. In summary, the plasticity 576  
rules allowing learning positive and negative consequences are consistent with the 577  
observed plasticity and the receptor properties. 578

Recently, there has been a debate concerning the fundamental concept of basal 579  
ganglia function, i.e. the relationship between the Go and No-Go neurons: on one hand 580  
they have the opposite effects on a tendency to make movements [2], but on the other 581

hand they are co-activated during action selection [33]. The presented theory is  
consistent with both observations: It assumes that Go and No-Go neurons have  
opposite effects on movement initiation. But during action selection the basal ganglia  
need to calculate the utility which combines information encoded by both populations,  
so may require their co-activation.

The proposed model assumes that while an animal makes an effort, the reward  
prediction error should be negative, thus the dopamine level should decrease. However,  
at the time of lever pressing the system needs to be energized to perform a movement,  
so one could expect increased level of dopamine. Furthermore, voltametry studies  
measuring dopamine concentration in striatum did not observe decrease in dopamine  
level during lever pressing [32]. Nevertheless a recent study recording activity of single  
dopaminergic neurons that provided a better temporal resolution reported that  
dopaminergic neurons increased the activity before movement, and then decreased it  
below baseline during movement [30]. The increase before movement may be related  
with energizing system for movement, while the decrease during movement may be  
related with representing effort.

Another study [34] directly tested whether dopaminergic signals encode expected  
efforts alongside expected payoffs. It reports dopaminergic bursts in the nucleus  
accumbens of rats, triggered by unexpected opportunities. According to the theory of  
temporal difference learning, such bursts encode reward prediction errors. These  
prediction errors occur whenever a reward or the anticipation of a reward is  
unexpectedly encountered. If, for instance, an unexpected cue signals an opportunity to  
gain reward, a prediction error equal to the value of the opportunity will arise. In our  
theory, the value of opportunities or actions is assembled from payoffs, costs and  
motivation. Does the dopaminergic signal investigated in [34] signal the value of  
opportunities according to our theory? Three different opportunities featured in the  
investigation of Hollon et al.: an opportunity that yielded a small payoff for little effort  
served as a reference, and was compared with two high-payoff opportunities. Those  
options required different levels of effort, chosen such that the rats would prefer one of  
them over the reference, while rejecting the other one. In economic terms, one  
opportunity had a higher utility than the reference option, while the other one had a  
lower utility. The dopamine measurements obtained by Hollon et al. did not reflect the

value of actions - they were much better explained by the mere payoff of the 614  
opportunities. Dopamine concentrations were uniformly higher for the high-payoff 615  
opportunities than for the reference option, even though their values (expressed through 616  
the choices of the rats) were spread around the value of the reference option. The 617  
different efforts showed strongly in the choice, but only negligibly in the dopamine 618  
bursts. This poses a challenge to our theory, which assumes that both payoffs and costs 619  
of actions are encoded in the basal ganglia. However, from the results of the study by 620  
Hollon et al. it is not clear if effort is not represented in the basal ganglia at all, or 621  
simply does not affect the value signalled by dopaminergic neurons. Distinction between 622  
these hypotheses will require further experiments, as discussed below. 623

## Experimental predictions 624

A direct test of the proposed model could involve recording of activity of Go and No-Go 625  
neurons (e.g. with photometry) during a task in which an animal learns the payoffs and 626  
costs associated with an action. Assuming that  $G$  and  $N$  are reflected in the activity of 627  
the Go and No-Go neurons while the animal evaluates an action (i.e. just before its 628  
selection), one could analyze the changes in the activity of Go and No-Go neurons across 629  
trials. One could compare if they follow the pattern predicted by the rules given in this 630  
paper, or rather by other rules proposed to describe learning in striatal neurons [7, 8, 14]. 631

Similarly as the OpAL model [8], the theory proposes that the positive and negative 632  
consequences are separately encoded by the Go and No-Go neurons which are 633  
differentially modulated by dopamine. The theory predicts that agonists specific to just 634  
one of the striatal populations (e.g. a D2 agonist), should decrease the effect of 635  
consequences encoded by this population (e.g. negative) without changing the impact of 636  
the other population. This prediction could be tested in an experiment involving choice 637  
between options with both payoff and cost. In particular, the theory predicts that the 638  
degree of preference of a neutral option ( $p = 1, n = 1$ ) over a high cost option 639  
( $p = 1, n = 2$ ) should increase with D2-agonist, while the preference of a high payoff 640  
option ( $p = 2, n = 1$ ) over a neutral option ( $p = 1, n = 1$ ) should not be affected by the 641  
D2-agonist. 642

It could also be worthwhile to investigate whether changing the influence of positive 643

and negative consequences on choice can not only be achieved by pharmacological 644  
manipulations, but also by changing a behavioral context such as hunger, or reward rate 645  
which has been shown to affect the average dopamine level [19]. If such an experiment 646  
was done in humans (or non-human primates), an eye-tracker could be used to 647  
investigate whether participants spend more time on a part of the stimulus informing 648  
about payoff in blocks with high hunger or reward rate. 649

The theory assumes that the synaptic plasticity rules include a decay term 650  
proportional to the value of the synaptic weights themselves. Decay terms are also 651  
present in other models of learning in basal ganglia [15, 35, 37]. This class of models 652  
predicts that the synaptic weights of striatal neurons which are already high increase 653  
less during potentiation than the smaller weights (an opposite prediction is made by the 654  
OpAL model [8], where the weights scale the prediction error in the update rule). This 655  
prediction could be tested by observing the Excitatory Post-Synaptic Currents (EPSCs) 656  
evoked at individual spines. The class of model including decay predicts that the spines 657  
with smaller evoked EPSCs before inducing plasticity should be more likely to 658  
potentiate. 659

## Relationship to other theories 660

The proposed model builds on the seminal work of Collins and Frank [8], who proposed 661  
that the Go and No-Go neurons learn the tendency to execute and inhibit movements, 662  
and how the level of dopamine changes the influence of the Go and No-Go pathways on 663  
choice. The key new feature of the present model is the ability to learn both payoffs and 664  
costs associated with a single action. We demonstrated above that when the model 665  
repeatedly selects an action resulting first in a cost and then in the payoff,  $G$  and  $N$  - 666  
under certain conditions that we specified - converge to the magnitudes of that payoff 667  
and cost. This is not so in the original OpAL model, as we shall show in a brief analysis. 668

Collins and Frank [8] demonstrated that when the environment is stationary and 669  
prediction error  $\delta$  converges to zero, then the weights  $G$  and  $N$  in the OpAL model 670  
converge to bounded values. However, we will show that Go and No-Go weights 671  
converge to zero when an action that results first in a cost and then in the payoff is 672  
repeatedly selected. 673



The OpAL model is based on the actor critic framework; hence, the prediction error is defined as in Eq (28). The weights of the critic are modified simply as  $\Delta V = \alpha\delta$ . The weights of the actor are modified according to the following equations [8]:

$$\Delta G = \alpha G \delta \quad (29)$$

$$\Delta N = -\alpha N \delta \quad (30)$$

Fig 10 shows how the weights change in a simulation of the OpAL model. The weights of the critic approach a value close to the average of payoff and cost. Let us consider what happens in the model once the critic weight stops changing between trials (i.e. from  $\sim 10$ th trial onward in Fig 10). The weight of the critic still changes within a trial, i.e. decreases when cost is incurred and increases after a payoff. This happens because the prediction error oscillates around 0, i.e. it is equal to  $\delta = -d$  while incurring a cost and  $\delta = d$  while receiving a payoff, where  $d$  is a constant. If so, let us consider how a Go weight changes within a trial. According to Eq (29) the weight changes as follows:

$$G_{\text{after cost}} = G_{\text{before action}} - \alpha G_{\text{before action}} d \quad (31)$$

$$G_{\text{after payoff}} = G_{\text{after cost}} + \alpha G_{\text{after cost}} d \quad (32)$$

Substituting Eq (31) into Eq (32) we obtain:

$$\begin{aligned} G_{\text{after payoff}} &= G_{\text{before action}} - \alpha G_{\text{before action}} d + \alpha (G_{\text{before action}} - \alpha G_{\text{before action}} d) d \\ &= G_{\text{before action}} - \alpha^2 G_{\text{before action}} d^2 \end{aligned} \quad (33)$$

We see that within a trial a Go weight decays proportionally to its value, resulting in an exponential decay across trials seen in Fig 10. Analogous calculations show that the No-Go weight decays in the same way. We conclude that the OpAL model is unable to estimate positive and negative consequences for actions which result in both payoffs and

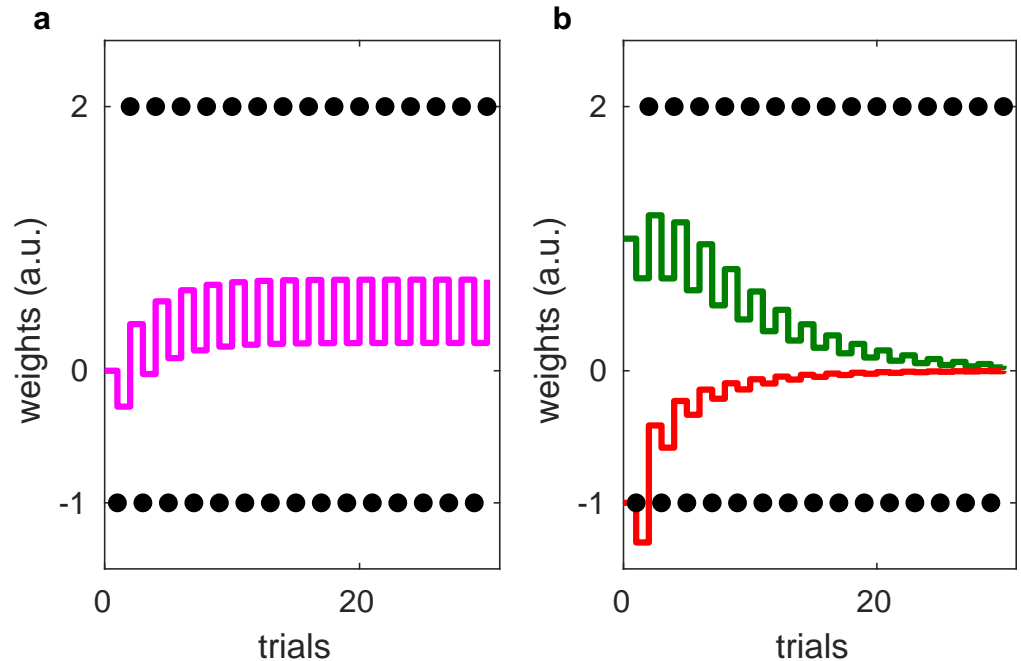

**Fig 10. Changes in the weight  $G$  of Go neurons,  $N$  of No-Go neurons and  $V$  of the critic in the OpAL model over the course of simulations.** (a) The purple line represents the evolving critic weight. The experienced rewards are indicated by black dots. (b) The actor weights, represented by a green and a red line respectively, were initialized to  $G = N = 1$ . Again, the black dots indicate the received rewards. The simulation was run with learning rate  $\alpha = 0.3$ .

costs. It is worth noting that the decay of actor weights to zero demonstrated above is 691  
specific to the version of basal ganglia model proposed by Collins and Frank [8], but 692  
would not be present in another version of the model [35] where the learning rules 693  
include a special term preventing the weights from approaching zero. 694

The model described in this paper has been shown to account for the effects of 695  
dopamine depletion on willingness to make effort, which have also been simulated with 696  
the OpAL model. To simulate the effects of dopamine depletion on choice between an 697  
arm of a T-maze with more pellets behind a barrier and an arm with with fewer 698  
pellets, [8] trained a model on three separate actions: eating in the left arm, eating in 699  
the right arm, and crossing a barrier. In this way it was ensured that each action had 700  
just payoff or just cost, and the model could learn them. Subsequently, during choice the 701  
model was deciding between a combination of two actions (e.g. crossing a barrier and 702  
eating in the left arm) and the other action. By contrast, the model proposed in this 703  
paper was choosing just between the two options available to an animal in an analogous 704  
task (Fig 6), because it was able to learn both payoffs and costs associated with each 705

option. This is a useful ability, as most real world actions have both payoffs and costs. 706

In the original paper introducing the plasticity rules [16], it was proposed that the 707  
rules allow the Go and No-Go neurons to encode reward variability, because when an 708  
action results in variable rewards, both  $G$  and  $N$  increase during learning. It was 709  
further proposed that the tonic level of dopamine controls the tendency to make risky 710  
choices, as observed in experiments [36], because it leads to emphasizing potential gains, 711  
and under-weighting potential losses. However, here it is proposed that the striatal 712  
learning rules primarily sub-serve a function more fundamental for survival, i.e. learning 713  
payoffs and costs of actions. From this perspective, the influence of dopamine level on 714  
tendency to make risky choices arises as a by-product of a system primarily optimized 715  
to weight payoffs and costs according to the current motivational state. 716

## Directions for the future work 717

There are multiple directions in which the presented theory could be extended. For 718  
example, the theory has to be integrated with the models of action selection in the basal 719  
ganglia to describe how the circuit selects the action with the best trade-off of payoffs 720  
and costs. Furthermore, the theory may be extended to describe the dependence of the 721  
dopaminergic teaching signal on the motivational state [38]. 722

It is intriguing to ask whether the evaluation of actions combining separately 723  
encoded positive and negative consequences is also performed by areas beyond the basal 724  
ganglia. Indeed, positive and negative associations are encoded by different populations 725  
of neurons in the amygdala [39]. Moreover, an imaging study [40] suggests that costs 726  
and payoffs are predicted by the amygdala and the ventral striatum respectively, and 727  
ultimately compared in the prefrontal cortex. Furthermore, different cortical regions 728  
preferentially project to Go or No-Go neurons [41], raising the possibility that the 729  
positive and negative consequences are also encoded separately in the cortex. Therefore, 730  
it seems promising to investigate if similar plasticity rules could also describe learning 731  
beyond the basal ganglia. 732

## Materials and methods

During simulations of an experiment by Salamone et al. [23], the model received payoff  $p_{\text{pellet}} = 10$  for choosing a pellet, and payoff  $p_{\text{chow}}$  for approaching the lab chow. The model was simulated in two conditions differing in the cost of choosing a pellet which was equal to  $n_{\text{pellet}} = 0$  in the free-pellet condition, and to  $n_{\text{pellet}} = n_{\text{lever}}$  in a condition requiring lever pressing to obtain a pellet. There was no cost of choosing lab chow ( $n_{\text{chow}} = 0$ ). For each condition, the model was simulated in two dopamine states: in the intact state the dopaminergic motivation signal was equal to a baseline value during choice  $D = 0.5$  while in the state corresponding to the presence of dopamine antagonist it was set to a lower value  $D = D_{\text{anta}}$ .

For each condition and state, the behavior of  $N_{\text{rats}}$  was simulated. Each simulation consisted of 180 training and 180 testing trials (as each animal in the experiment of [23] was tested for 30 minutes, so 180 trials corresponds to an assumption that a single trial took 10s). At the start of each simulation, the weights were initialized to  $G_{\text{pellet}} = N_{\text{pellet}} = G_{\text{chow}} = N_{\text{chow}} = 0.1$ . During each training trial, the model experienced choosing a pellet as well as approaching the lab chow. In detail, it received the cost  $n_{\text{pellet}}$ , modified the weights  $G_{\text{pellet}}$  and  $N_{\text{pellet}}$ , then received the payoff  $p_{\text{pellet}}$  and modified the weight again, and analogously for the lab chow. During each testing trial, the thalamic activity for each option was calculated from Eq 24), and Gaussian noise with standard deviation  $\sigma$  was added. An option with the highest thalamic activity was selected, and if this activity was positive, the action was executed, resulting in the corresponding cost and payoff and weight modification. If thalamic activity for both options was negative, no action was executed and no weights were updated.

The values of model parameters:  $p_{\text{chow}}, n_{\text{lever}}, D_{\text{anta}}, \sigma$  were optimized to match the choices made by the animals. In particular, for each set of parameters, the model was simulated  $N_{\text{rats}} = 100$  times, and the average number of choices  $c_{i,j,k}^{\text{sim}}$  of option  $i$  in dopamine state  $j$  and experimental condition  $k$  was computed. The mismatch with corresponding consumption in experiment  $c_{i,j,k}^{\text{exp}}$  was quantified by a normalized summed squared error:

$$\text{Cost} = \sum_{k=1}^2 \sum_{j=1}^2 \sum_{i=1}^2 \left( \frac{c_{i,j,k}^{\text{sim}}}{Z_k^{\text{sim}}} - \frac{c_{i,j,k}^{\text{exp}}}{Z_k^{\text{exp}}} \right)^2 \quad (34)$$

In the above equation  $Z_k^{dataset}$  is a normalization term equal to the total number of choices or consumption in a particular condition:

$$Z_k^{dataset} = \sum_{j=1}^2 \sum_{i=1}^2 c_{i,j,k}^{dataset} \quad (35)$$

The values of parameters minimizing the cost function were sought using the Simplex optimization algorithm implemented in Matlab, and the following values were found:  $p_{chow} = 3.64$ ,  $n_{lever} = 4.57$ ,  $D_{anta} = 0.30$  and  $\sigma = 1.10$ . Subsequently, the model with these optimized parameters was simulated with  $N_{rats} = 6$ , which was the number of animals tested by [23]. The resulting mean number of choices across animals are shown in Fig 7.

## Acknowledgments

The authors wish to thank Jacqueline Pumphrey for composing a lay summary of this article.

## References

1. Redgrave P, Prescott TJ, Gurney K. The basal ganglia: a vertebrate solution to the selection problem? *Neuroscience*. 1999;89:1009–1023.
2. Kravitz AV, Freeze BS, Parker PR, Kay K, Thwin MT, Deisseroth K, et al. Regulation of parkinsonian motor behaviours by optogenetic control of basal ganglia circuitry. *Nature*. 2010;466:622–626.
3. Smith Y, Beyan MD, Shink E, Bolam JP. Microcircuitry of the direct and indirect pathways of the basal ganglia. *Neuroscience*. 1998;86:353–388.
4. Surmeier DJ, Ding J, Day M, Wang Z, Shen W. D1 and D2 dopamine-receptor modulation of striatal glutamatergic signaling in striatal medium spiny neurons. *Trends Neurosci*. 2007;30:228–235.

5. Gurney K, Prescott TJ, Redgrave P. A computational model of action selection in the basal ganglia. I. A new functional anatomy. *Biol Cybernetics*. 2001;84:401–410.
6. Humphries MD, Khamassi M, Gurney K. Dopaminergic control of the exploration-exploitation trade-off via the basal ganglia. *Frontiers in Neurosci*. 2012;6:9.
7. Schroll H, Vitay J, Hamker H. Dysfunctional and compensatory synaptic plasticity in Parkinson's disease *European Journal of Neuroscience*. 2014;39:688–702.
8. Collins AG, Frank MJ. Opponent actor learning (OpAL): Modeling interactive effects of striatal dopamine on reinforcement learning and choice incentive. *Psychol Rev*. 2014;121:337–366.
9. Schultz W, Dayan P, Montague PR. A neural substrate of prediction and reward. *Science*. 1997;275:1593–1599.
10. Eshel N, Tian J, Bukwich M, Uchida N. Dopamine neurons share common response function for reward prediction error. *Nat Neurosci*. 2016;19:479–486.
11. Shen W, Flajolet M, Greengard P, Surmeier DJ. Dichotomous dopaminergic control of striatal synaptic plasticity. *Science*. 2008;321:848–851.
12. Frank MJ, Seeberger LC, O'Reilly RC. By carrot or by stick: cognitive reinforcement learning in parkinsonism. *Science*. 2004;306:1940–1943.
13. Hong S, Hikosaka O. Dopamine-mediated learning and switching in cortico-striatal circuit explain behavioral changes in reinforcement learning. *Frontiers Behav Neurosci*. 2011;5.
14. Gurney KN, Humphries MD, Redgrave P. A new framework for cortico-striatal plasticity: behavioural theory meets in vitro data at the reinforcement-action interface. *PLoS Biology*. 2015;13:e1002034.
15. Yttri EA, Dudman JT. Opponent and bidirectional control of movement velocity in the basal ganglia. *Nature*. 2016;533(7603):402–406.

16. Mikhael JG, Bogacz R. Learning reward uncertainty in the basal ganglia. *PLoS Comput Biol.* 2016;12:e1005062.
17. Niv Y. Cost, benefit, tonic, phasic. *Ann NY Acad Sci.* 2007;1104:357–376.
18. Howe M, Dombeck D. Rapid signalling in distinct dopaminergic axons during locomotion and reward. *Nature.* 2016;535:505–510.
19. Hamid AA, Pettibone JR, Mabrouk OS, Hetrick VL, Schmidt R, Vander Weele CM, et al. Mesolimbic dopamine signals the value of work. *Nat Neurosci.* 2016;19:117–126.
20. Berke JD. What does dopamine mean? *Nat Neurosci.* 2018;doi:10.1038/s41593-018-0152-y.
21. Morris G, Arkadir D, Nevet A, Vaadia E, Bergman H. Coincident but distinct messages of midbrain dopamine and striatal tonically active neurons. *Neuron* 2004;43:133–143.
22. Nair AG, Gutierrez-Arenas O, Eriksson O, Vincent P, Kotaleski JH. Sensing positive versus negative reward signals through adenylyl cyclase-coupled GPCRs in direct and indirect pathway striatal medium spiny neurons. *J. Neurosci.* 2015, 35:14017–14030.
23. Salamone JD, Steinpreis RE, McCullough LD, Smith P, Grebel D, Mahan K. Haloperidol and nucleus accumbens dopamine depletion suppress lever pressing for food but increase free food consumption in a novel food choice procedure. *Psychopharmacology.* 1991;104:515–521.
24. Thurley K, Senn W, Lüscher HR. Dopamine increases the gain of the input-output response of rat prefrontal pyramidal neurons. *J Neurophysiol.* 2008;99:2985–2997.
25. Beeler JA, Frank MJ, McDavid J, Alexander E, Turkson S, Bernandez MS, et al. A role for dopamine-mediated learning in the pathophysiology and treatment of Parkinson's disease. *Cell Reports.* 2012;2:1747–1761.

26. Doya K. What are the computations of the cerebellum, the basal ganglia and the cerebral cortex? *Neural Networks*. 1999;12:961–974.
27. Salamone JD, Correa M, Yohn S, Cruz LL, San Miguel N, Alatorre L. The pharmacology of effort-related choice behavior: Dopamine, depression, and individual differences. *Behav Process*. 2016;127:3–17.
28. Chong TTJ, Bonnelle V, Manohar S, Veromann KR, Muhammed K, Tofaris GK, et al. Dopamine enhances willingness to exert effort for reward in Parkinson's disease. *Cortex*. 2015;69:40–46.
29. Dreyer JK, Herrik KF, Berg RW, Hounsgaard JD. Influence of phasic and tonic dopamine release on receptor activation. *J Neurosci*. 2010;30:14273–14283.
30. Dodson PD, Dreyer JK, Jennings KA, Syed EC, Wade-Martins R, Cragg SJ, et al. Representation of spontaneous movement by dopaminergic neurons is cell-type selective and disrupted in parkinsonism. *P Natl Acad Sci USA*. 2016;113:E2180–E2188.
31. Richfield EK, Penney JB, Young AB. Anatomical and affinity state comparisons between dopamine D1 and D2 receptors in the rat central nervous system. *Neuroscience*. 1989;30:767–777.
32. Syed EC, Grima LL, Magill PJ, Bogacz R, Brown P, Walton ME. Action initiation shapes mesolimbic dopamine encoding of future rewards. *Nature Neurosci*. 2016;19:34–36.
33. Cui G, Jun SB, Jin X, Pham MD, Vogel SS, Lovinger DM, et al. Concurrent activation of striatal direct and indirect pathways during action initiation. *Nature*. 2013;494:238–242.
34. Hollon NG, Arnold MM, Gan JO, Walton ME, Phillips PEM. Dopamine-associated cached values are not sufficient as the basis for action selection. *P Natl Acad Sci*. 2014;111:18357–18362.
35. Franklin NT, Frank MJ. A cholinergic feedback circuit to regulate striatal population uncertainty and optimize reinforcement learning. *Elife*. 2015;4:e12029.



36. Rutledge RB, Skandali N, Dayan P, Dolan RJ. Dopaminergic modulation of decision making and subjective well-being. *J Neurosci*. 2015;35:9811–9822.
37. Kato A, Morita K. Forgetting in Reinforcement Learning Links Sustained Dopamine Signals to Motivation. *PLoS Comput Biol*. 2016;12:e1005145.
38. Cone JJ, Fortin SM, McHenry JA, Stuber GD, McCutcheon JE, Roitman MF. Physiological state gates acquisition and expression of mesolimbic reward prediction signals. *P Natl Acad Sci USA*. 2016;113:1943–1948.
39. Namburi P, Beyeler A, Yorozu S, Calhoon GG, Halbert SA, Wichmann R, et al. A circuit mechanism for differentiating positive and negative associations. *Nature*. 2015;520:675–678.
40. Basten U, Biele G, Heekeren HR, Fiebach CJ. How the brain integrates costs and benefits during decision making. *PNAS*. 2010; 107:21767–21772
41. Wall NR, De La Parra M, Callaway EM, Kreitzer AC. Differential innervation of direct-and indirect-pathway striatal projection neurons. *Neuron*. 2013;79:347–360.
